# Supplementary material
Source: publisher figshare collection journal article supplement (https://tandf.figshare.com/ndownloader/files/1589055)
Supplement: Supplementary file 1 [file 1589055]

**Supplemented Data:**

Table 1: Characteristics of *Bacillus cereus* 64-INS

| *Morphological Characteristics* | | | *Nutritional Characteristics* | |
| --- | --- | --- | --- | --- |
| Gram staining | | Positive Rods | Maltose | + |
| Spore | | + | Lactose | - |
| Motility | | + | Sucrose | + |
| Colony color | | Cream | Glucose | + |
| Colony surface | | Rough & Dry | Tributyrin | + |
| Colony shape | | Irregular | Indole | - |
| *Growth Conditions* | | | Arabinose | - |
| Temperatures | 28 – 40 oC | | Rhamnose | - |
| pH | 4.0 – 9.0 | | Melibiose | - |
| Oxygen | Facultative | | Starch | + |
| *Physiological Characteristics* | | | Fructose | + |
| Catalase | + | | Citrate | + |
| Oxidase | - | | Mannitol | - |
| Gelatinase | + | | Sorbitol | - |
| Urease | - | | Voges-Proskauer | + |

| Sample Type | Location | pH | Temperature | Humidity |
| --- | --- | --- | --- | --- |
| Domestic sludge (DS) | Main sewer Upper Mall, Lahore (Latitude: 31.499069 No, Altitude: 74.291814 Eo) | 6.2±0.1 | 30.4±0.3 | 54.8±0.3 |

Table 2: Sample characteristics

Table 3: Bacteria isolated from Domestic Sludge

| Sr. No. | Isolate code | Sudan black B staining | Nile Blue A staining | Starch hydrolysis test |
| --- | --- | --- | --- | --- |
| 1 | 06-INS | + | - | + |
| 2 | 08-INS | - | - | + |
| 3 | 10-INS | - | - | - |
| 4 | 11-INS | + | + | ++ |
| 5 | 25-INS | - | - | - |
| 6 | 30-INS | - | - | - |
| 7 | 32-INS | + | - | - |
| 8 | 39-INS | - | - | + |
| 9 | 46-INS | - | - | + |
| 10 | 47-INS | + | - | ++ |
| 11 | 49-INS | + | - | - |
| 12 | 53-INS | - | - | - |
| 13 | 62-INS | - | - | + |
| 14 | 63-INS | - | - | + |
| 15 | 64-INS | + | + | +++ |
| 16 | 69-INS | - | - | + |
| 17 | 70-INS | + | - | - |
| 18 | 73-INS | + | - | - |
| 19 | 80-INS | - | - | - |


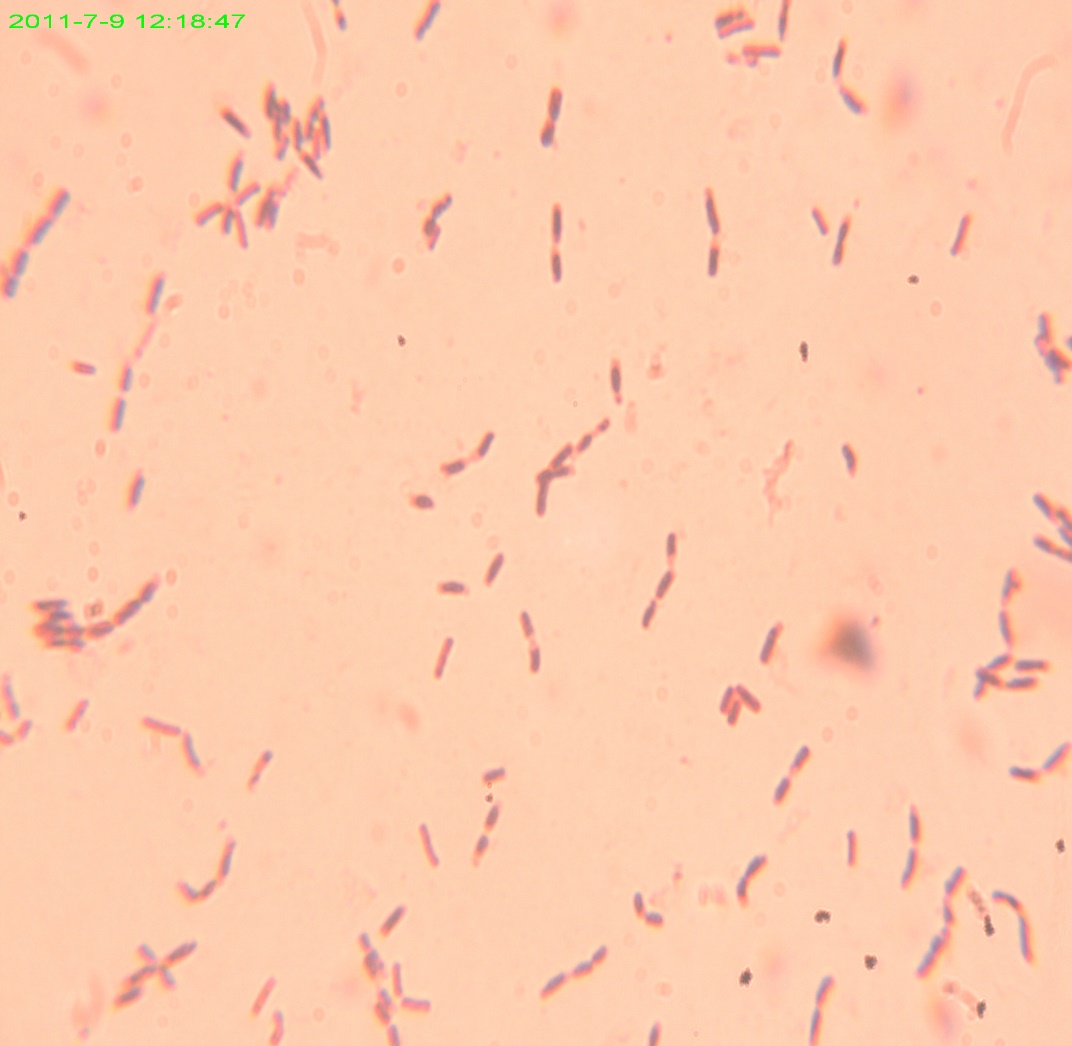


PHA

Figure 1: Sudan black B staining for isolate 64-INS (Dark blue bodies inside the cell represent the PHA)
